# Supplementary material for: What Is a Mild Winter? Regional Differences in Within-Species Responses to Climate Change
Source: PLOS journal article supplement (doi:10.1371/journal.pone.0132178), 2015-07-09
Supplement: S1 (10.1371/journal.pone.0132178.s001) [file journal.pone.0132178.s001]

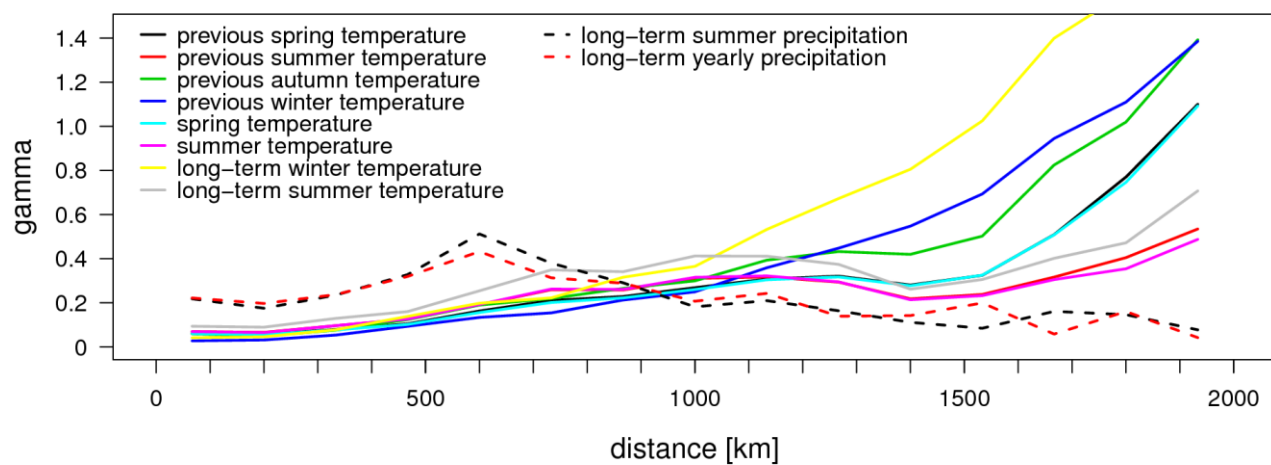

**S1 Fig. Semivariogram showing the spatial autocorrelation structure of the climatic variables.**
