# Supplementary material for: What Is a Mild Winter? Regional Differences in Within-Species Responses to Climate Change
Source: PLOS journal article supplement (doi:10.1371/journal.pone.0132178), 2015-07-09
Supplement: S2 (10.1371/journal.pone.0132178.s002) [file journal.pone.0132178.s002]

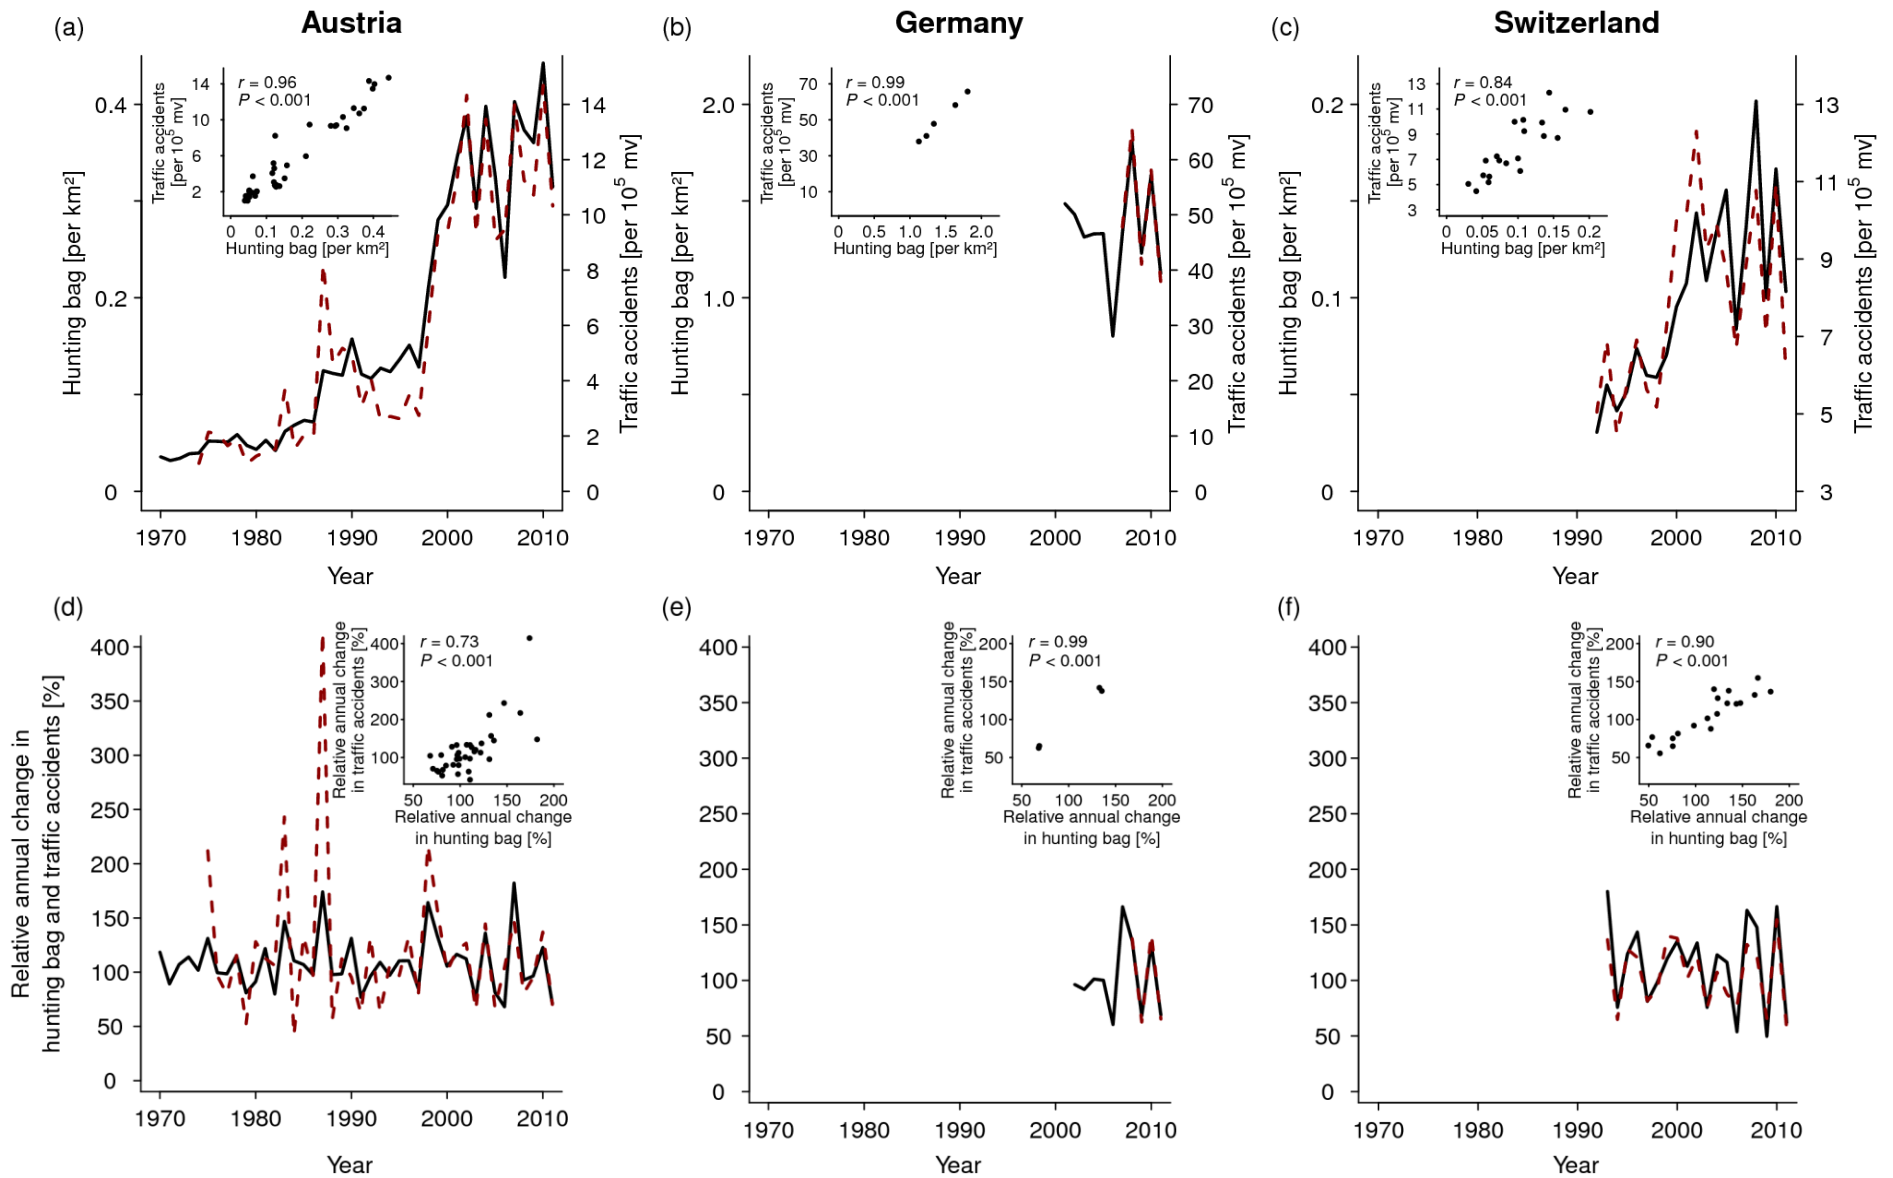

**S2 Fig. Wild boar hunting bags and traffic accidents involving wild boar.** Data are shown for (a, d) Austria (b, e) Germany, and (c, f) Switzerland. In a, b, c — shows the hunting bag (left axis) and - - shows the traffic accidents corrected for the number of motor-vehicles (mv = cars and trucks) registered (right axis). The insert plots show the correlations between these two variables. In d, e, f — shows the relative change in the hunting bag and - - shows the relative change in traffic accidents (also corrected for the number of motor-vehicles registered). In both analyses (a-c vs. d-f) very high correlation coefficients were obtained for all three countries, despite the fact that there is a different hunting system in some parts of Switzerland. These findings justify the use of wild boar hunting bags as a proxy for population size, since traffic accidents can be regarded as a random sampling of population size.
