# Supplementary material for: What Is a Mild Winter? Regional Differences in Within-Species Responses to Climate Change
Source: PLOS journal article supplement (doi:10.1371/journal.pone.0132178), 2015-07-09
Supplement: S3 (10.1371/journal.pone.0132178.s003) [file journal.pone.0132178.s003]

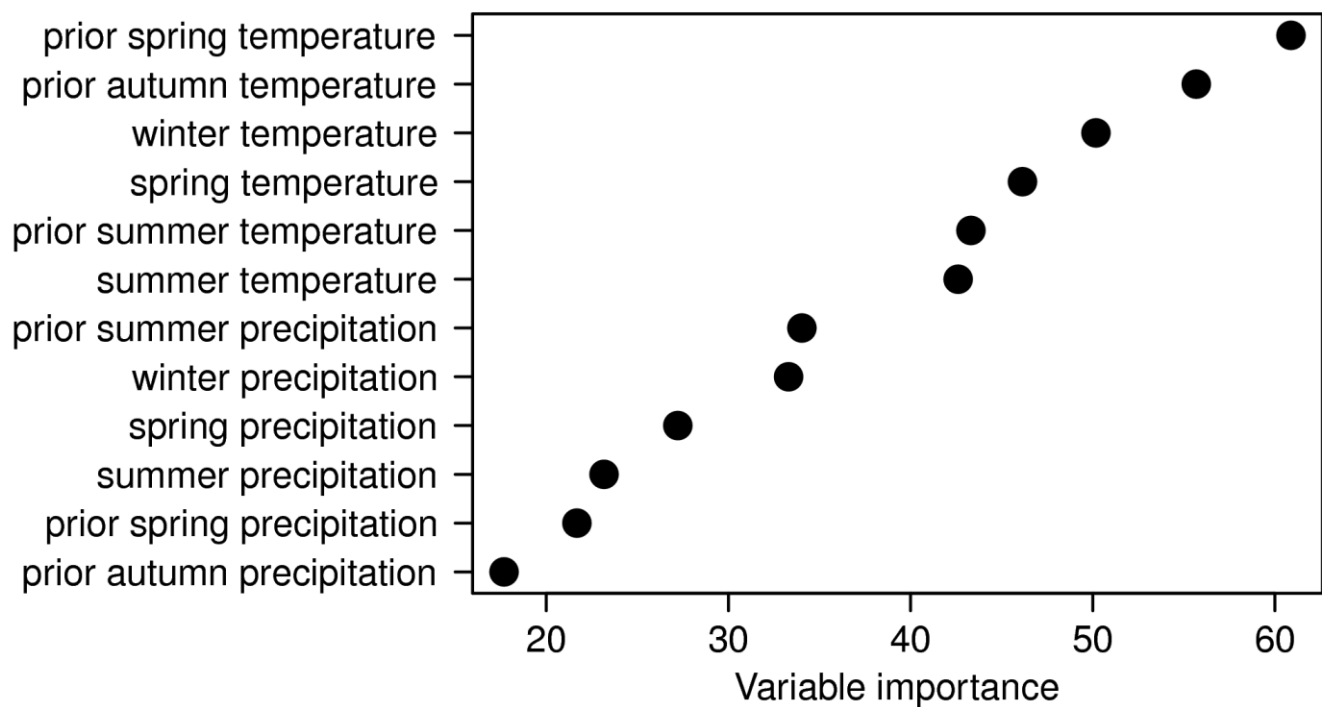

**S3 Fig. Importance of climatic variables according to a 'random forest' analysis.** Variable importance is given as the percental increase of the mean standard error under random permutation of the respective variables. See methods for the definition of seasons.
